# Supplementary material for: Investigation of the interactions between silver nanoparticles and Hela cells by scanning electrochemical microscopy
Source: Royal Society of Chemistry journal article supplement (doi:10.1039/b807057a), 2008-01-01
Supplement: b807057a.pdf [file b807057a.pdf]

## Investigation of the interactions between silver nanoparticles and Hela cells by scanning electrochemical microscopy<sup>†</sup>

Zhong Chen,<sup>a</sup> Shubao Xie,<sup>a</sup> Li Shen,<sup>a</sup> Yu Du,<sup>a</sup> Shali He,<sup>a</sup> Qing Li,<sup>a</sup> Zhongwei Liang,<sup>a</sup> Xin Meng,<sup>a</sup> Bo Li,<sup>a</sup> Xiaodong Xu,<sup>a</sup> Hongwei Ma,<sup>b</sup> Yanyi Huang<sup>b</sup> and Yuanhua Shao\*<sup>a</sup>

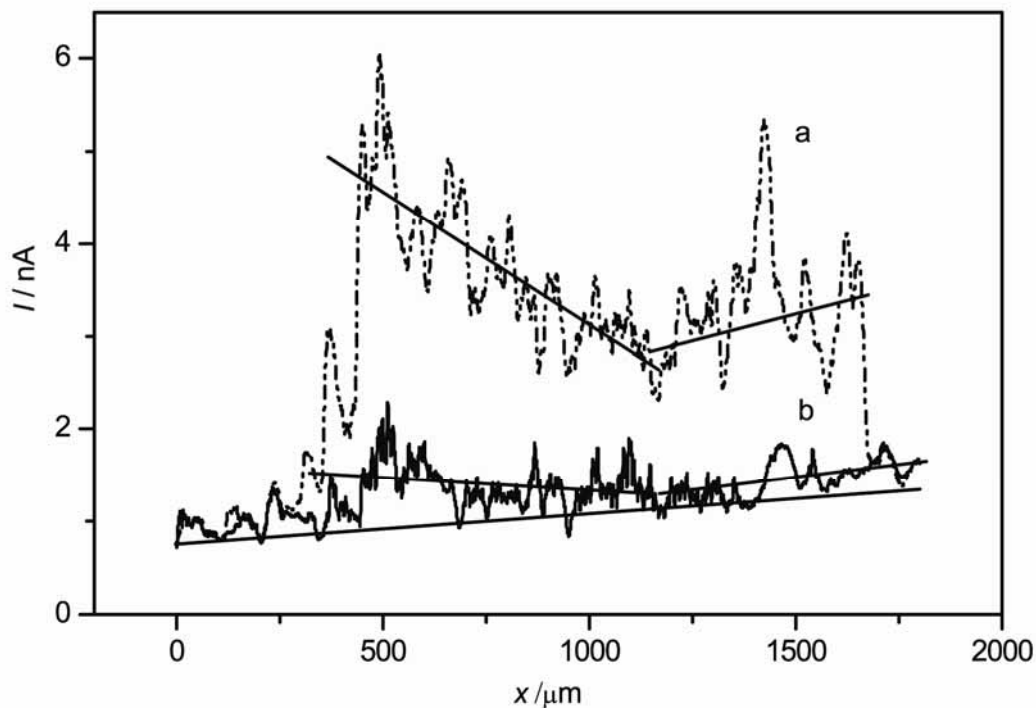

Figure S1

**Figure S1.** The signals of lateral probe scanning over the silver nanoparticles spots. The mediator is  $\text{K}_3\text{IrCl}_6$  (a) or  $\text{K}_3\text{Fe}(\text{CN})_6$  (b) and the diameter of the cluster is about 1.2  $\mu\text{m}$ . The straight lines stand for the average of the signals and the baseline, respectively. The scan rate is 30  $\mu\text{m}/\text{s}$ .

Figure S1 shows the differences between the two mediators when the probe scanning laterally over the same silver clusters (the diameter of the spot is about 1.2  $\mu\text{m}$ ) deposited on the PVDF membrane by SECM. The signals based on  $\text{K}_3\text{IrCl}_6$  are about 5 times larger than those based on  $\text{K}_3\text{Fe}(\text{CN})_6$ .
